# Supplementary material for: A ratiometric electrochemical sensor for multiplex detection of cancer biomarkers using bismuth as an internal reference and metal sulfide nanoparticles as signal tags
Source: Royal Society of Chemistry journal article supplement (doi:10.1039/c9an00775j), 2019-01-01
Supplement: c9an00775j1.pdf [file c9an00775j1.pdf]

## Supporting Information

in

A ratiometric electrochemical sensor for detection multiplex cancer  
biomarkers using bismuth as internal reference and metal sulfide nanoparticles  
as signal tags

Lei Yu <sup>a,b</sup>, Xin Cui <sup>b</sup>, Huijuan Li <sup>c</sup>, Jianjun Lu <sup>a</sup>, Qi Kang <sup>a</sup>, Dazhong Shen <sup>a,\*</sup>

<sup>a</sup> College of Chemistry, Chemical Engineering and Materials Science, Collaborative Innovation Center of Functionalized Probes for Chemical Imaging in Universities of Shandong, the Key Lab in Molecular and Nano-materials Probes of the Ministry of Education of China, Shandong Normal University, Jinan 250014, China

<sup>b</sup> Shandong Peninsula Engineering Research Center of Comprehensive Brine Utilization, Weifang University of Science and Technology, Weifang, 262700, China

<sup>c</sup> College of Chemical and Environmental Engineering, Shandong University of Science and Technology, Qingdao, 266590, China

-----

\*Corresponding author. Tel.: +86-531-82615258. E-mail address: dzshen@sdsu.edu.cn (D.Z. Shen)

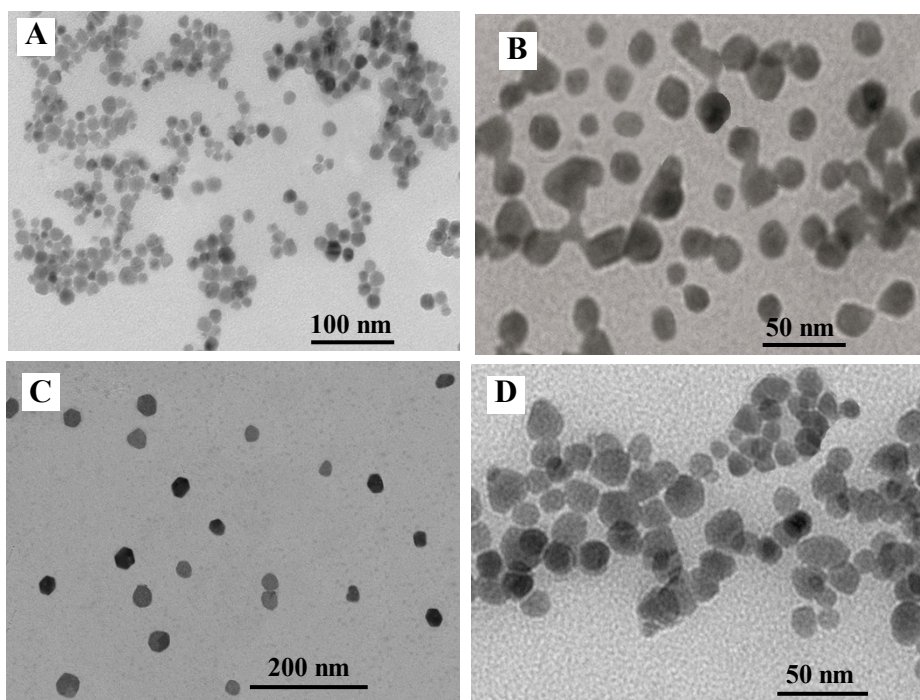

**Fig. S1** TEM images of CdS (A), HgS (B), PbS (C), ZnS (D) nanoparticles.

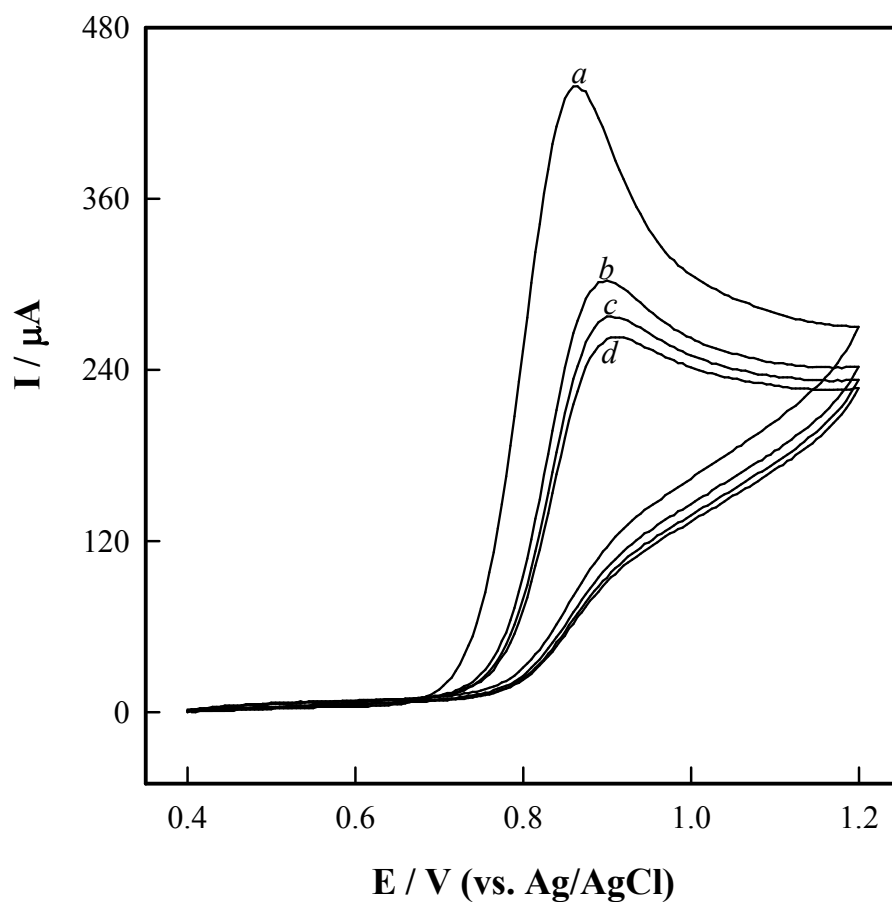

**Fig. S2** Repetitive cyclic voltammograms of GCE during the polymerization in 2.0 mM ATA +0.20 mg mL<sup>-1</sup> CNTs+ 5.0 mM H<sub>2</sub>SO<sub>4</sub> solution. Potential scan rate: 10 mV s<sup>-1</sup>. Curves *a* to *d* corresponding to scanning cycle number of 1 to 4.

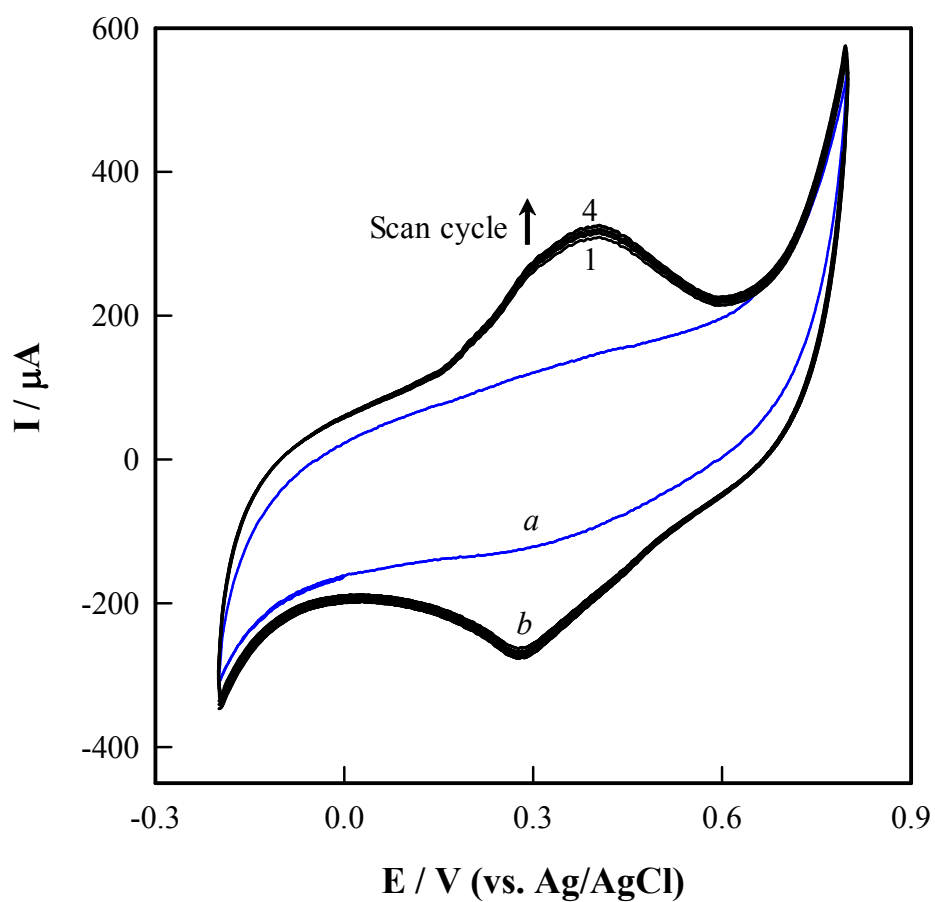

**Fig. S3** Repetitive cyclic voltammograms of CNTs-ATA/GCE in 0.1 M  $\text{H}_2\text{SO}_4$  (a) and 5.0 mM MSA+0.1 M  $\text{H}_2\text{SO}_4$  (b). Potential scan rate: 50  $\text{mV s}^{-1}$ .

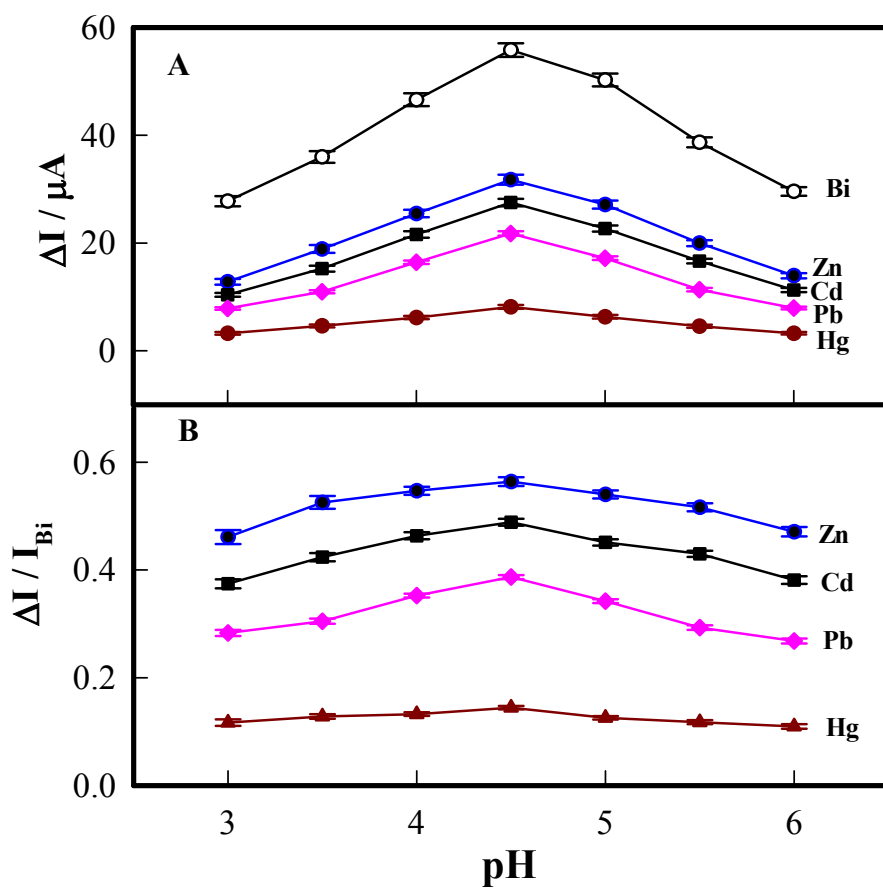

**Fig. S4** Influence of pH on the DPASV peak currents (A) and current ratio of target analytes to Bi (B) using the MSA-CNTs-ATA/GCE. The concentrations of Hg(II), Pb(II), Cd(II) and Zn(II) were  $30 \mu\text{g L}^{-1}$ . All the solutions were contained  $400 \mu\text{g L}^{-1}$  Bi(III)..

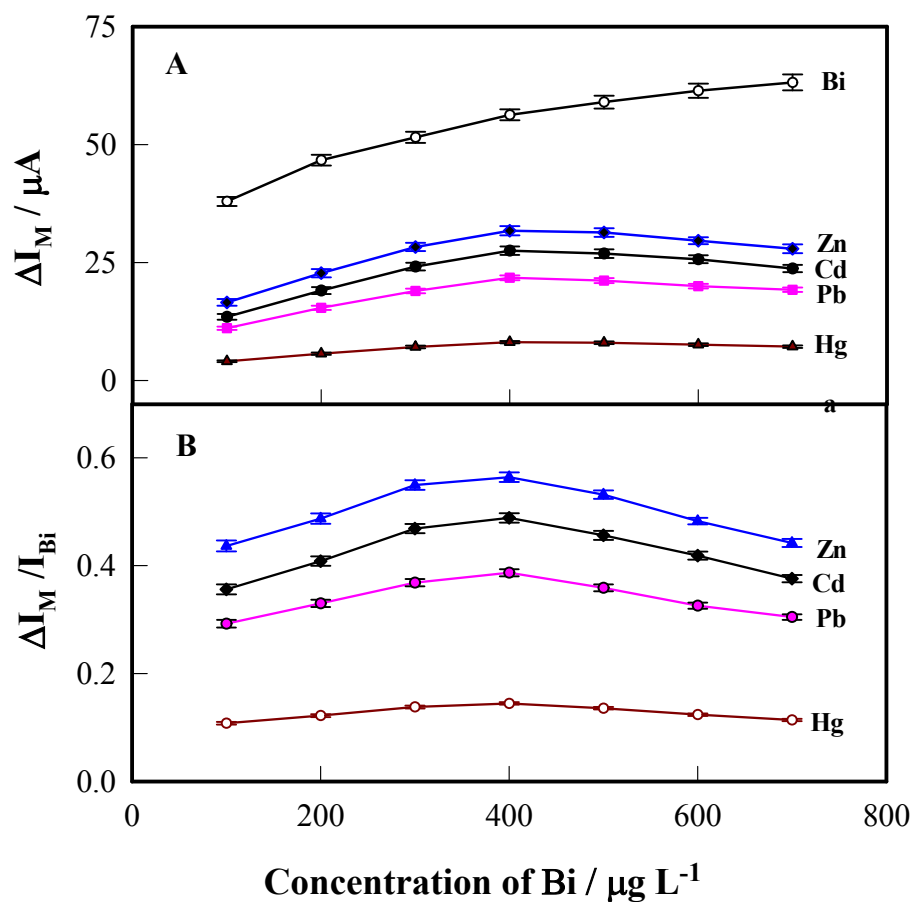

**Fig. S5** Influence of concentration of Bi(III) on the DPASV peak currents (A) and current ratio of target analytes to Bi (B) using the using the MSA-CNTs-ATA/GCE (pH4.5). The concentrations of Hg(II), Pb(II), Cd(II) and Zn(II) were  $30 \mu\text{g L}^{-1}$ .

**Table S1** Comparison of analytical performance of some electrochemical immunosensors for the four biomarkers.

| Signal tags                                     | Biomarker | Linear range * | LOD *                | Refs.     |
|-------------------------------------------------|-----------|----------------|----------------------|-----------|
| Fc-AuNPs-Ab <sub>2</sub>                        | CEA       | 0.05–20        | 0.01                 | S1        |
| Cu-CP-Ab <sub>2</sub>                           | CEA       | 0.1-100        | 0.02                 | S2        |
| Envision/PbS- Ab <sub>2</sub>                   | CEA       | 0.001-50       | 0.0002               | S3        |
| Thi-SA/DNA-Ab <sub>2</sub>                      | CEA       | 0.0002-0.6     | 4.8×10 <sup>-5</sup> | S4        |
| ZnS NPs -Ab <sub>2</sub>                        | CEA       | 0.003-10       | 0.00023              | This work |
| Aq-SA/DNA-Ab <sub>2</sub>                       | AFP       | 0.0002-0.8     | 6.2×10 <sup>-5</sup> | S4        |
| Envision/CdS-Ab <sub>2</sub>                    | AFP       | 0.001-50       | 0.0005               | S3        |
| Pd/APTES-M-CeO <sub>2</sub> -GS-Ab <sub>2</sub> | AFP       | 0.0001-50      | 3.3×10 <sup>-5</sup> | S5        |
| AuNPs-polymer brush-Ab <sub>2</sub>             | AFP       | 0.01-100       | 0.0018               | S6        |
| PbS NPs -Ab <sub>2</sub>                        | AFP       | 0.003-10       | 0.00011              | This work |
| Cd-CP-Ab <sub>2</sub>                           | CA125     | 1-150          | 0.3                  | S2        |
| AuNPs-aptamer-HCR                               | CA125     | 0.0001-10      | 5×10 <sup>-5</sup>   | S7        |
| AuNP-Lox-Ab <sub>2</sub>                        | CA125     | 0.01–100       | 0.002                | S8        |
| Cd NPs -Ab <sub>2</sub>                         | CA125     | 0.03-100       | 0.00068              | This work |
| Pb-CP-Ab <sub>2</sub>                           | CA19-9    | 1-150          | 0.4                  | S2        |
| V <sup>2+</sup> -Ab <sub>2</sub>                | CA19-9    | 0.01-200       | 0.0039               | S9        |
| HgS NPs-Ab <sub>2</sub>                         | CA19-9    | 0.03-100       | 0.0014               | This work |

\* AFP and CEA: ng mL<sup>-1</sup>, CA125 and CA19-9 : U mL<sup>-1</sup>

Aq-SA: anthraquinone 2-carboxylic acid-streptavidin, Fc: ferrocene, AuNPs-aptamer-HCR: gold nanoparticles-aptamer-hybridization chain reaction, AuNP-Lox: gold nanoparticle-lactate oxidase, CP: chitosan–poly(acrylic acid) nanospheres, Pd/APTES-M-CeO<sub>2</sub>-GS: graphene Oxide and CeO<sub>2</sub> mesoporous nanocomposite functionalized by the 3-aminopropyl-triethoxysilane supported Pd octahedral nanoparticles, Thi-SA : thionine- streptavidin, V<sup>2+</sup>: bipyridinium.

## References

- S1 X.F. Gu, Z. She, T.X. Ma, S. Tian and H.B.Kraatz, *Biosens. Bioelectron.*,2018, **102**, 610 – 616.
- S2 Q.F. Rong, F. Feng and Z.F. Ma, *Biosens. Bioelectron.*,2016, **75**, 148–154.
- S3 D.Wang, N. Gan, H.R. Zhang, T.H. Li, L. Qiao, Y.T. Cao, X.R. Su and S. Jiang, *Biosens. Bioelectron.*,2018, **65**,78–82.
- S4 Q.Zhu, Y.Q.Chai, Y.Zhuo and R. Yuan, *Biosens. Bioelectron.*, 2015, **68**,42–48.
- S5 Y.C. Wei, Y.Li, N.Li, Y.Zhang, T. Yan, H.M. Ma and Q.Wei, *Biosens. Bioelectron.*, 2016,**79**, 482–487.
- S6 H.Q. Wang and Z.F.Ma, *Sens. Actuators B*,2018, **256**,402–407.
- S7 Y. Nie, M. Yang and Y.Ding, *Microchim. Acta*, 2018, **185**,331.
- S8 P.S. Pakchin, H. Ghanbari, R.Saber and Y. Omid, *Biosens. Bioelectron.* , 2018, **122**, 68–74.
- S9 H. Zhu, G.C. Fan, E.S.Abdel-Halim, J.R.Zhang, J.J.Zhu, *Biosens. Bioelectron.*, 2016, **77**, 339–346.
